# Supplementary material for: Enzymatic Spermine Metabolites Induce Apoptosis Associated with Increase of p53, caspase-3 and miR-34a in Both Neuroblastoma Cells, SJNKP and the N-Myc-Amplified Form IMR5
Source: MDPI journal article supplement (doi:10.3390/cells10081950), 2021-07-31
Supplement: s1 [file s1]

Figure S1 Western blotting of SJNKP

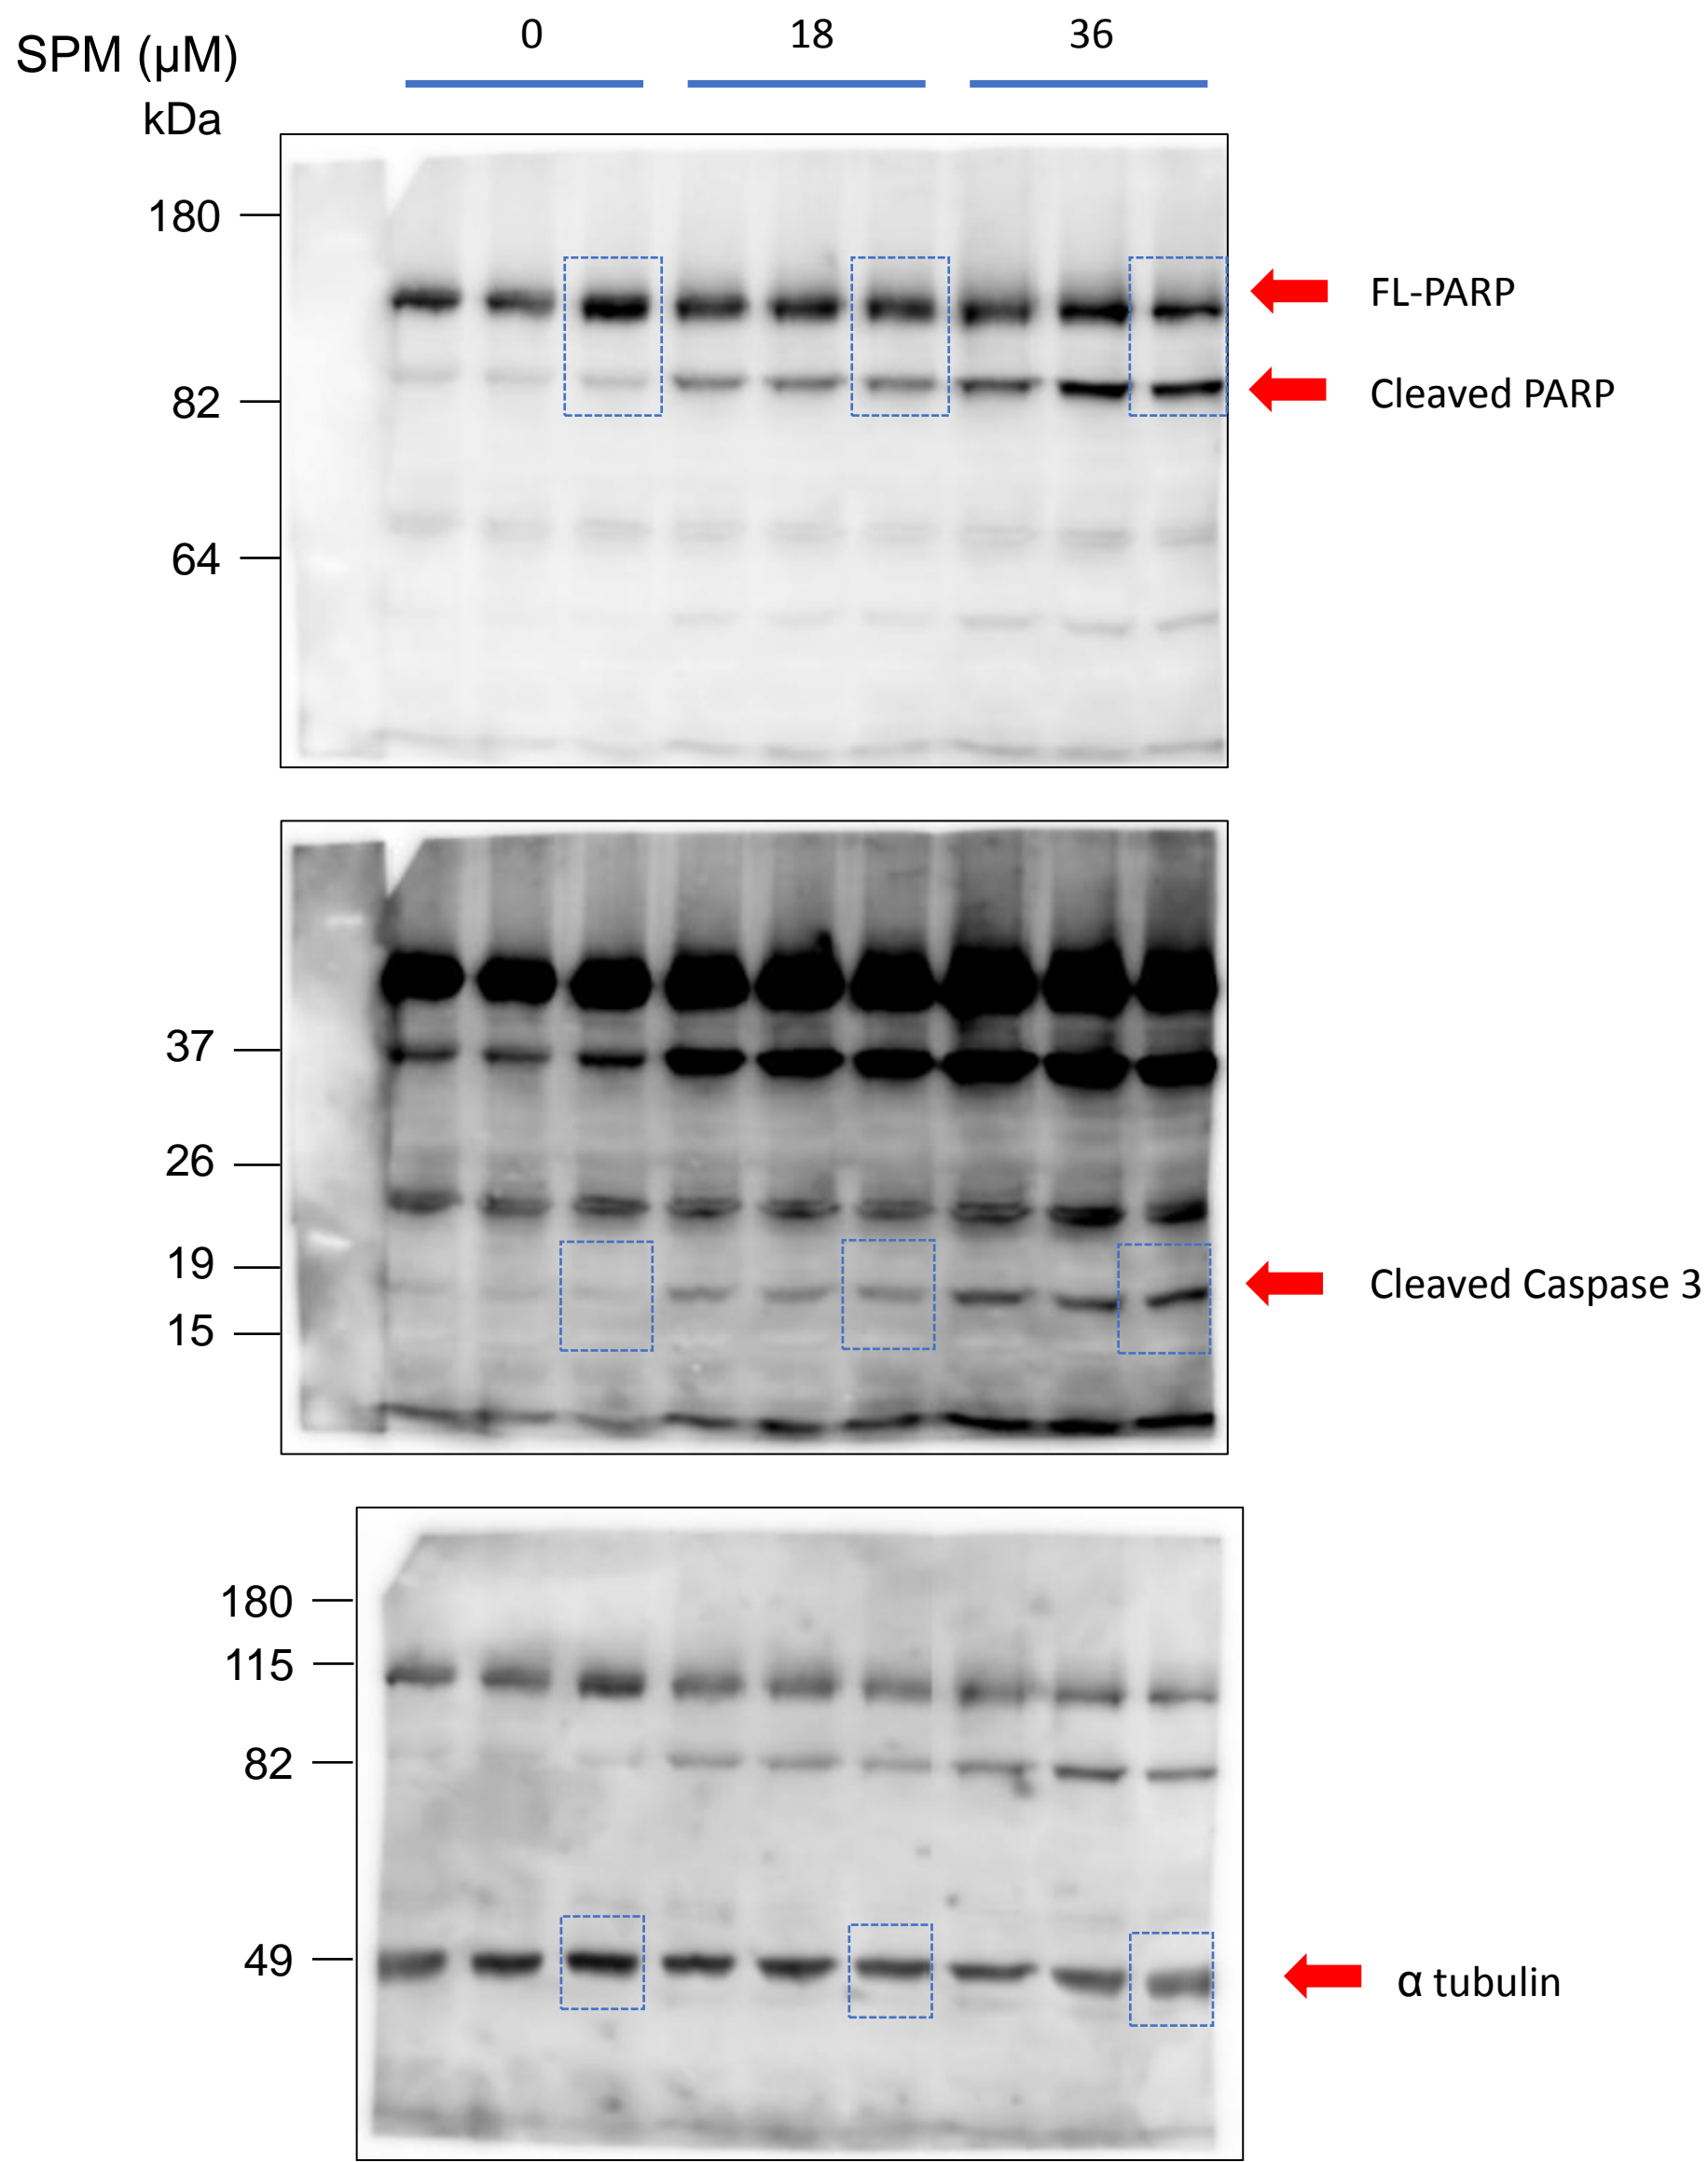

Figure 7A raw data

Figure S2 Western blotting of IMR5

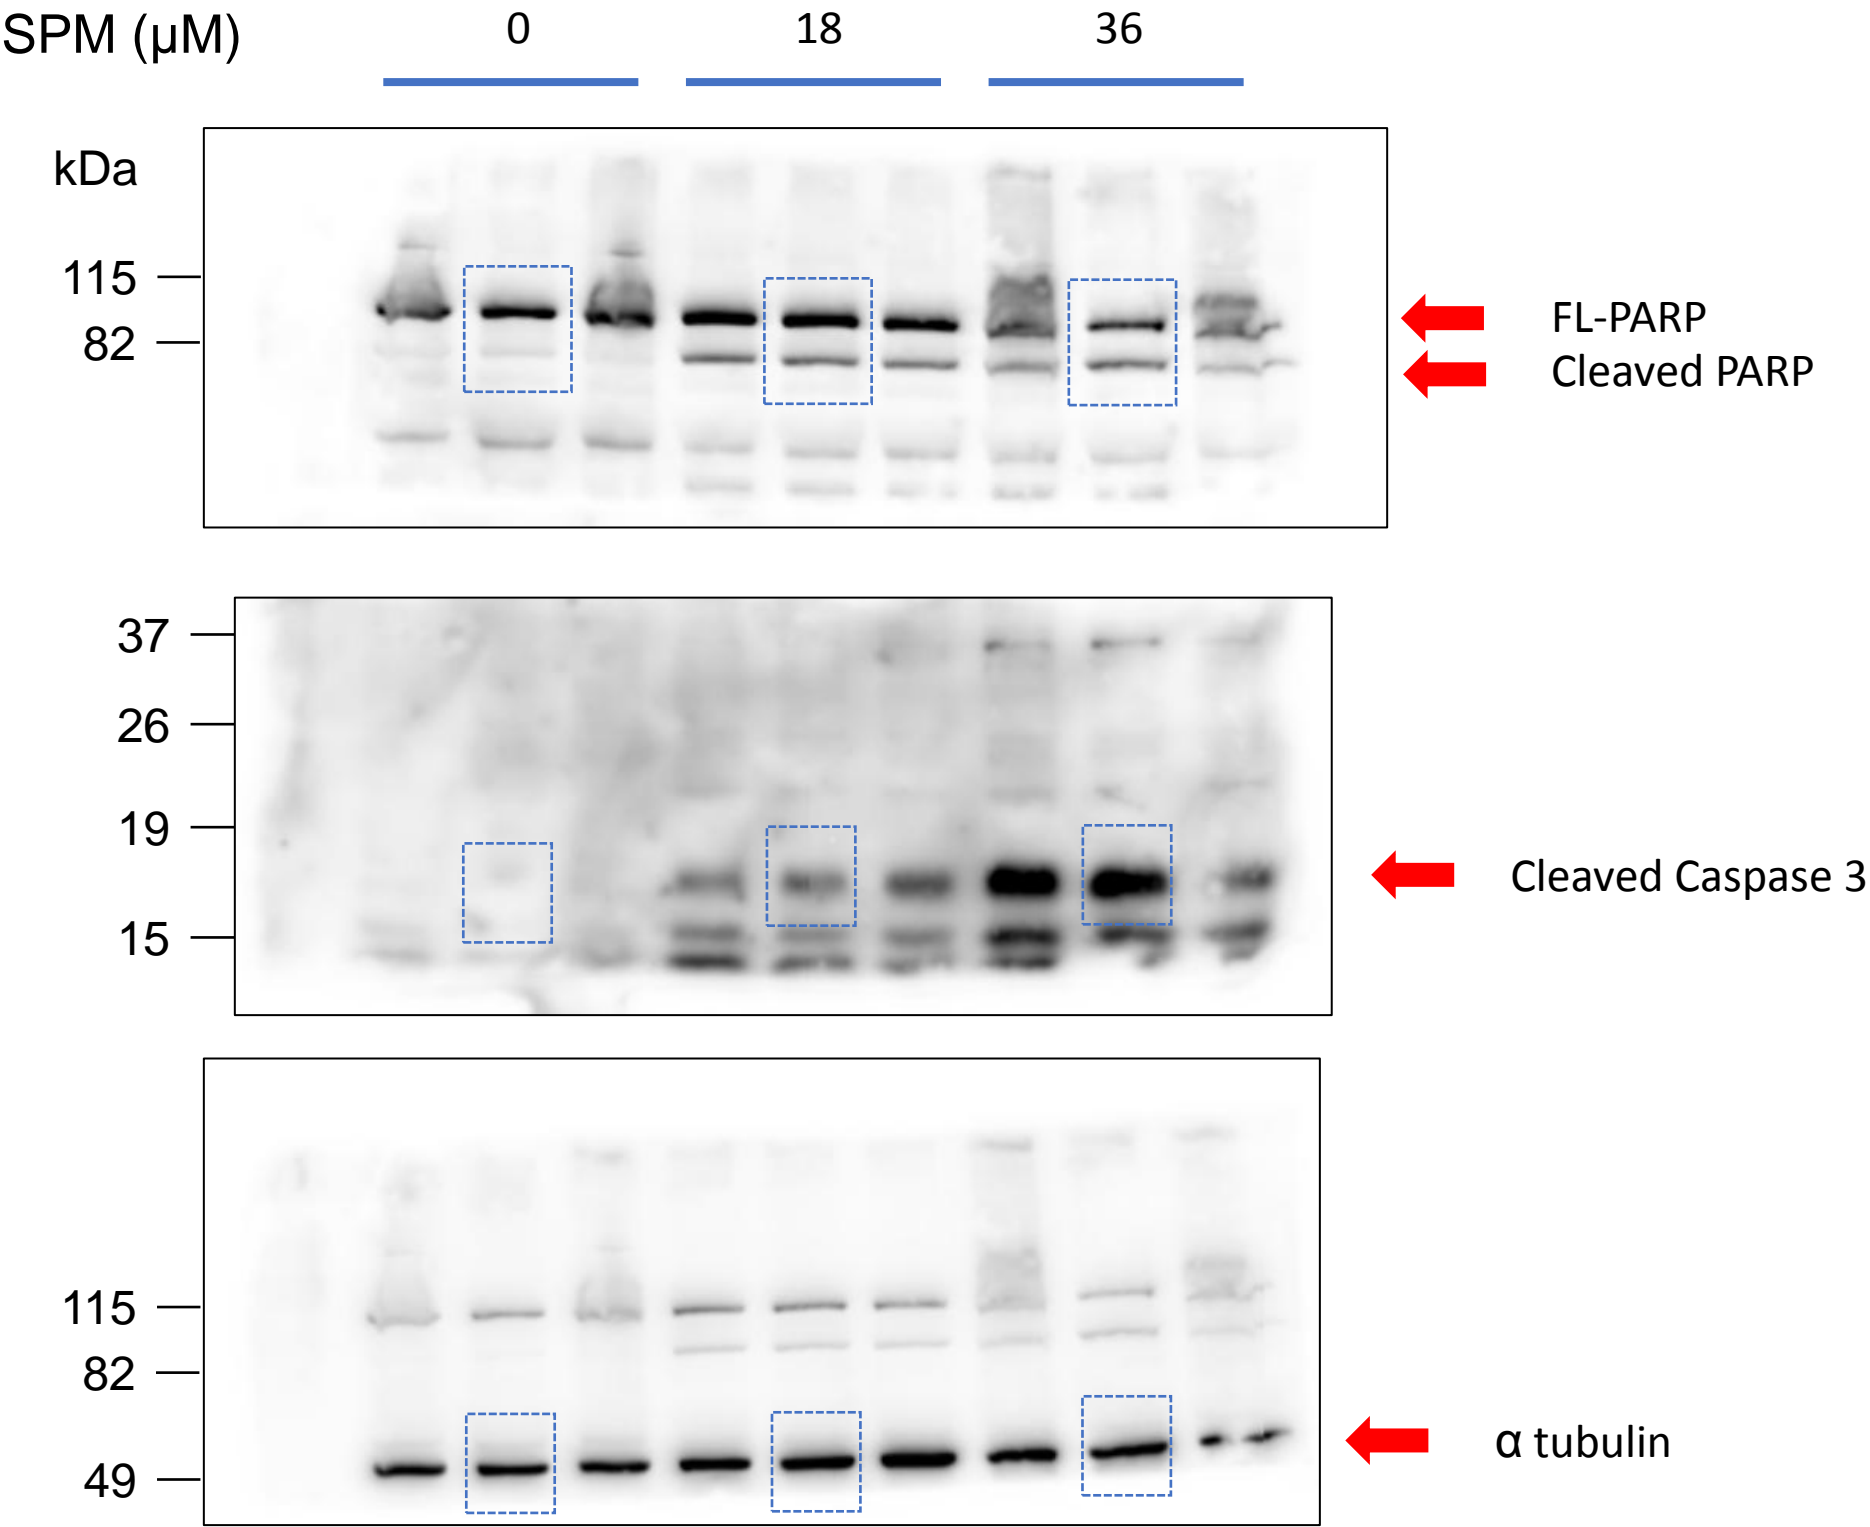

Figure 7C raw data
